# Supplementary material for: Structural characterization, optical properties and photocatalytic activity of MOF-5 and its hydrolysis products: implications on their excitation mechanism
Source: Royal Society of Chemistry journal article supplement (doi:10.1039/c5ra11182j), 2015-01-01

# Structural Characterization, Optical Properties and Photocatalytic Activity of MOF-5 and its Hydrolysis Products: Implications on their Excitation Mechanism.

## Supporting Information

Nicolás Artemio Rodríguez<sup>1</sup>, Rodrigo Parra<sup>1,2</sup>, María Alejandra Grela\*<sup>1</sup>.

<sup>1</sup>Departamento de Química, Facultad de Ciencias Exactas y Naturales, Universidad Nacional  
de Mar del Plata, Mar del Plata, Argentina.

<sup>2</sup>Instituto de Investigaciones en Ciencia y Tecnología de Materiales (INTEMA),  
CONICET-UNMdP, Mar del Plata, Argentina.

magrela@mdp.edu.ar

Keywords: MOF-5; Photocatalysis; Excitation mechanism; Hydrolysis.

### **Figure S1**

XRD pattern of dry MOF-5. MOF-5 was obtained by centrifugation from the DMF suspension and extensively washed with  $\text{CHCl}_3$  (Sintorgan, chromatographic grade) by centrifugation and redispersion cycles. Finally, the solid was dried in a vacuum-oven at  $90^\circ\text{C}$ , and stored in a desiccator.

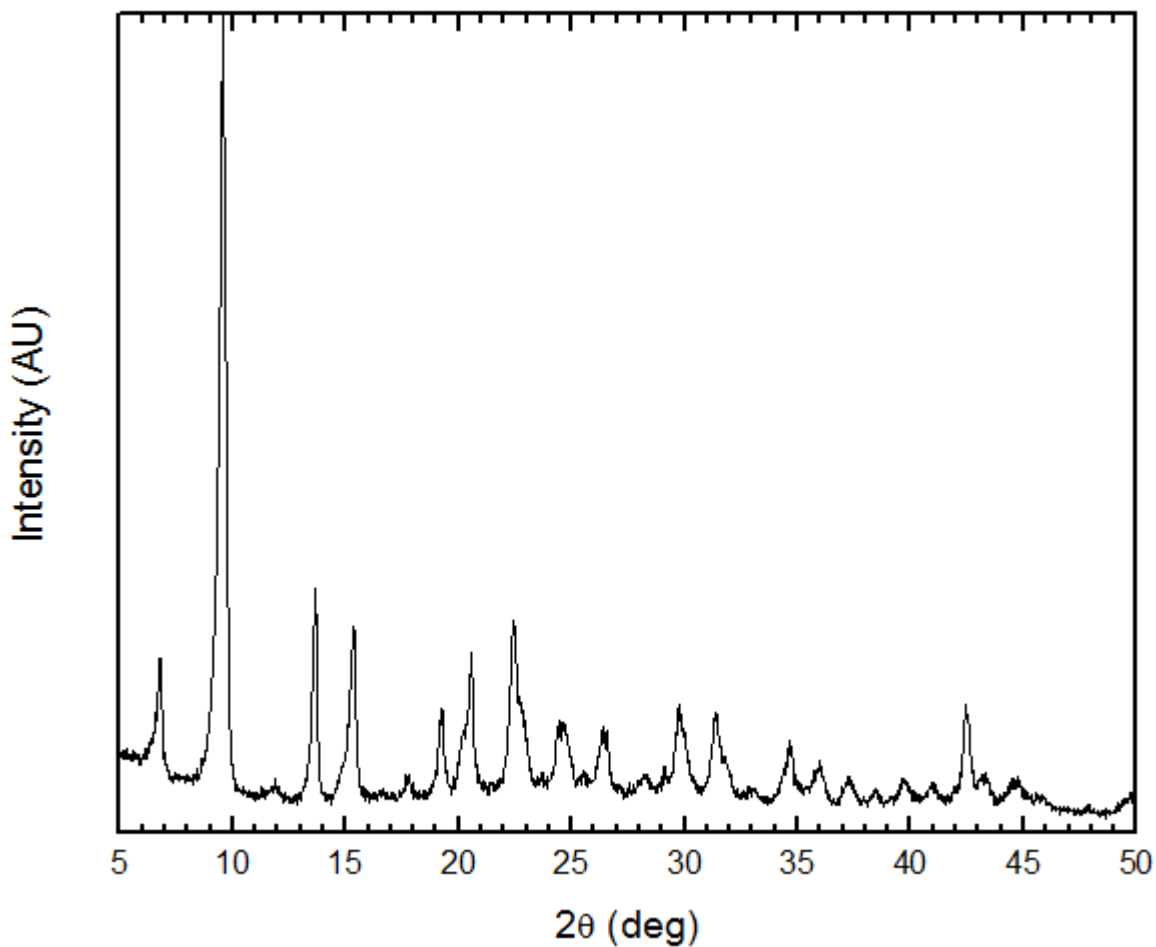

## Figure S2

XRD patterns of MOF-69C (top, dark yellow, [Reference 1]) and MOF-5W (bottom, red). The structures of MOF-5, MOF-5W and MOF-69C clusters are compared below.

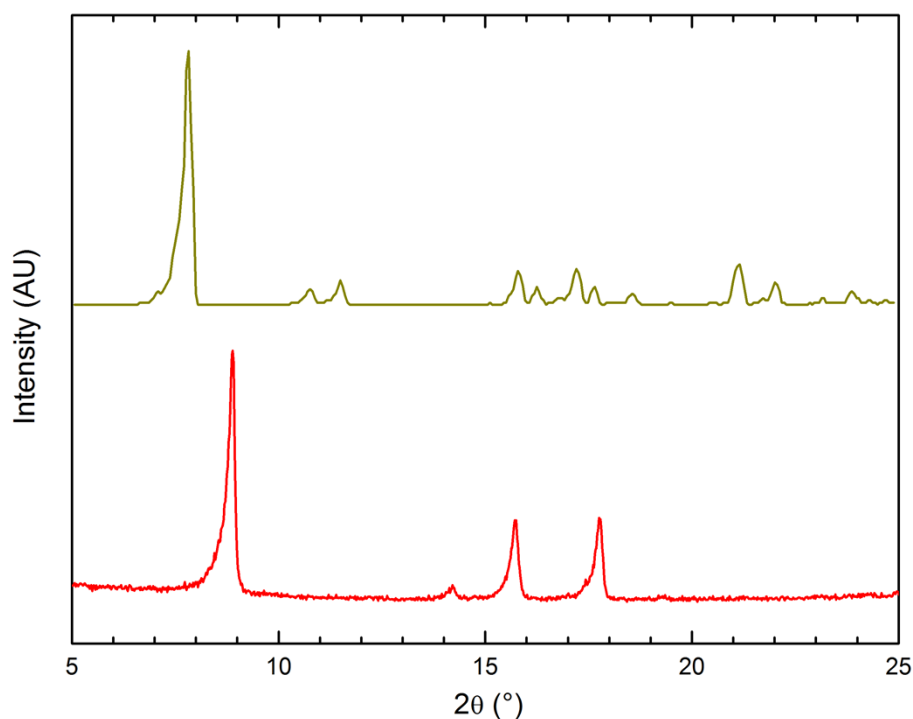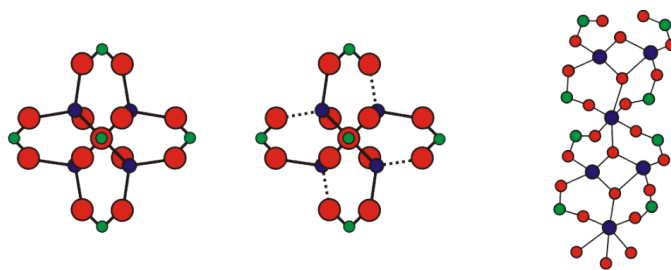

MOF-5 MOF-5W MOF-69C

Due to the noticeable differences between the metallic cluster morphologies, it is supposed that MOF-5 and MOF-69C cannot be in equilibrium at room temperature, as shown in S2 for MOF-5W and MOF-5. Thus, it is concluded that both phases are similar and that the main difference between them is the partial linkage of peripheral Zn-O bonds (see Scheme 1).

[1] Hausdorf, S.; Wagler, J.; Mossig, R.; Mertens, F. O. R. L. Proton and Water Activity-Controlled Structure Formation in Zinc Carboxylate-Based Metal Organic Frameworks. *J. Phys. Chem. A* **2008**, 112, 7567-7576.

**Figure S3**

XRD patterns of MOF-5 (top, blue), MOF-5H (bottom, red), and the solid obtained after redispersion of MOF-5H in DMF at room temperature (middle, green). The easy interconversion between MOF-5 and MOF-5W suggest that changes in cluster morphology are unlikely.

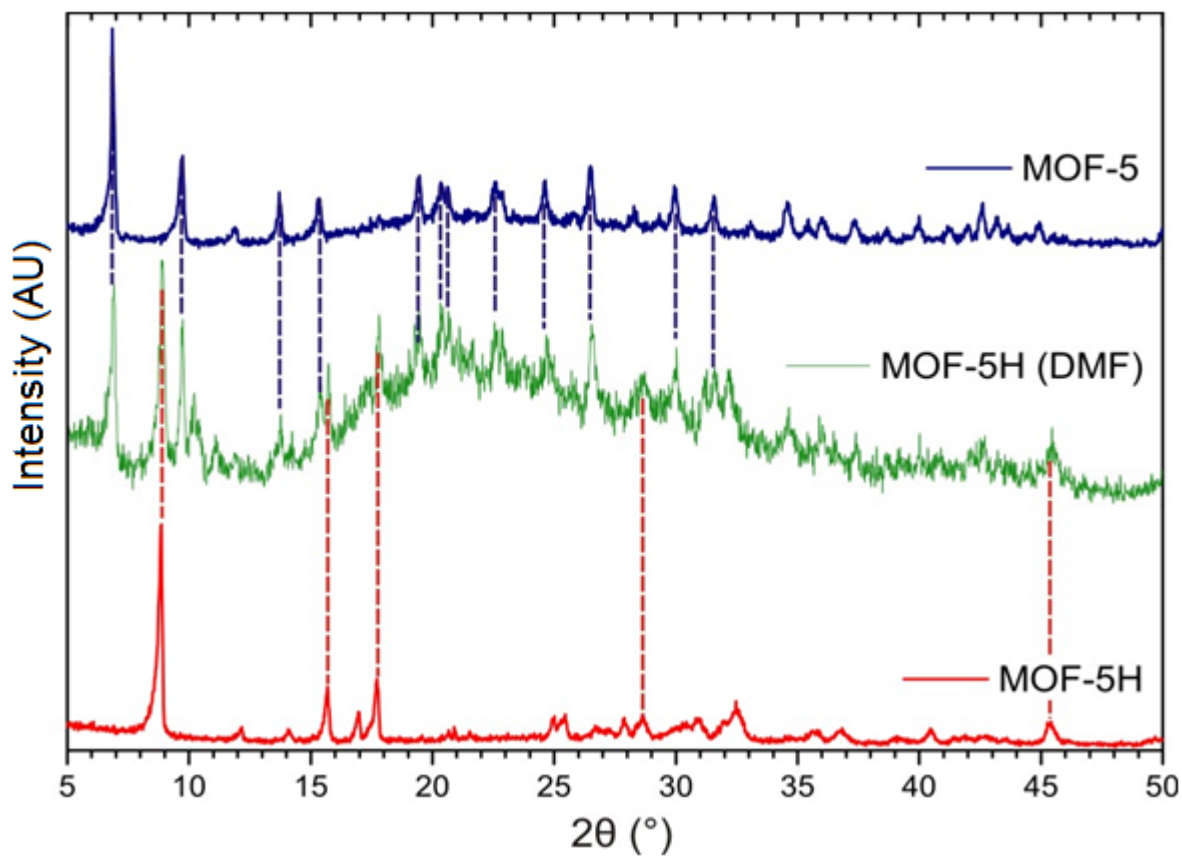

### Figure S4

XRD patterns of MOF-5H, MOF-5W and ZTDH (from top to bottom), showing that MOF-5H is a mixture of MOF-5W and ZTDH. ZTDH was synthesized following the protocol proposed by Thirumurugan *et al* [Reference 2]:  $\text{ZnSO}_4 \cdot 4 \text{H}_2\text{O}$  (1152 mg, Anedra),  $\text{H}_2\text{BDC}$  (664 mg, Aldrich), NaOH (320 mg, Anedra) and water (20 g) were mixed together in a closed recipient (molar ratios 1:1:2:278) and heated in a stove at 75°C during 72 h. The solid was washed twice with water and allowed to dry at room temperature in air.

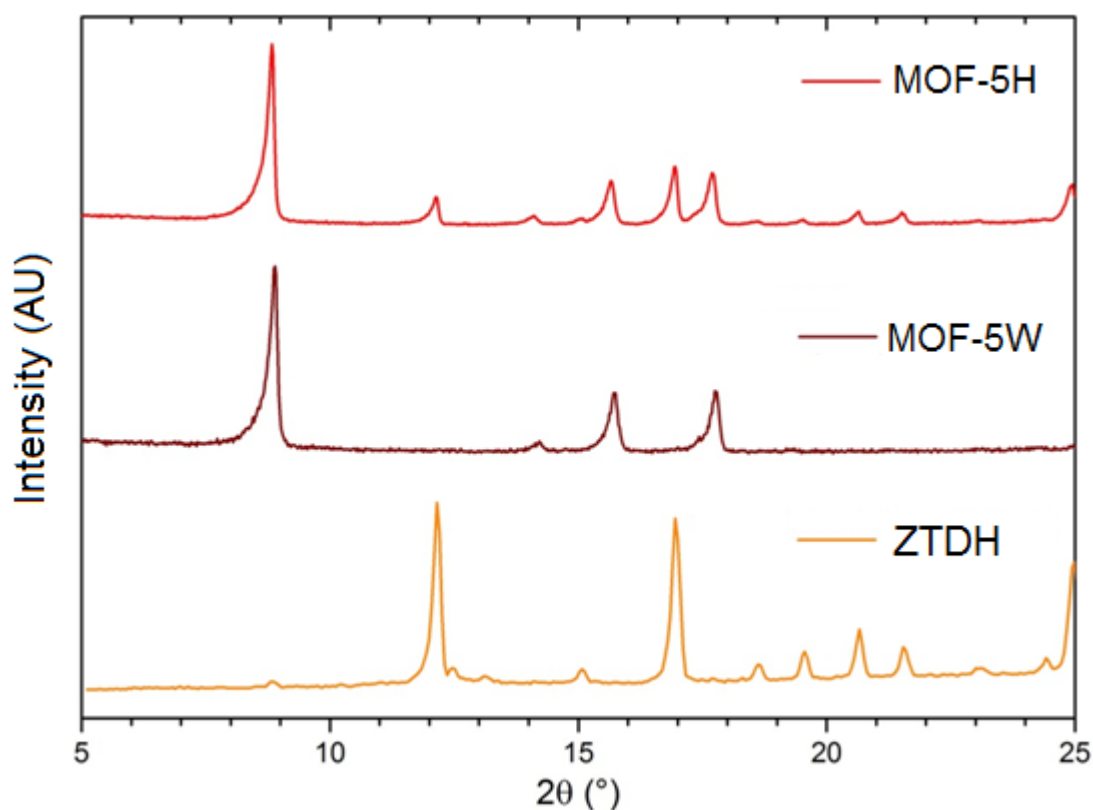

[2] Thirumurugan, A.; Rao, C. N. R. 1,2-, 1,3- and 1,4-Benzenedicarboxylates of Cd and Zn of Different Dimensionalities: Process of Formation of the Three-Dimensional Structure. *J. Mater. Chem.* **2005**, 15, 3852-3858.

**Figure S5**

FTIR spectra of MOF-5 and its hydrolysis products, MOF-5W and MOF-5H. Samples were prepared in the same way as for Raman analysis. It can be observed that the mode at  $1435\text{ cm}^{-1}$  disappears after water exposure, in contrast with Raman results..

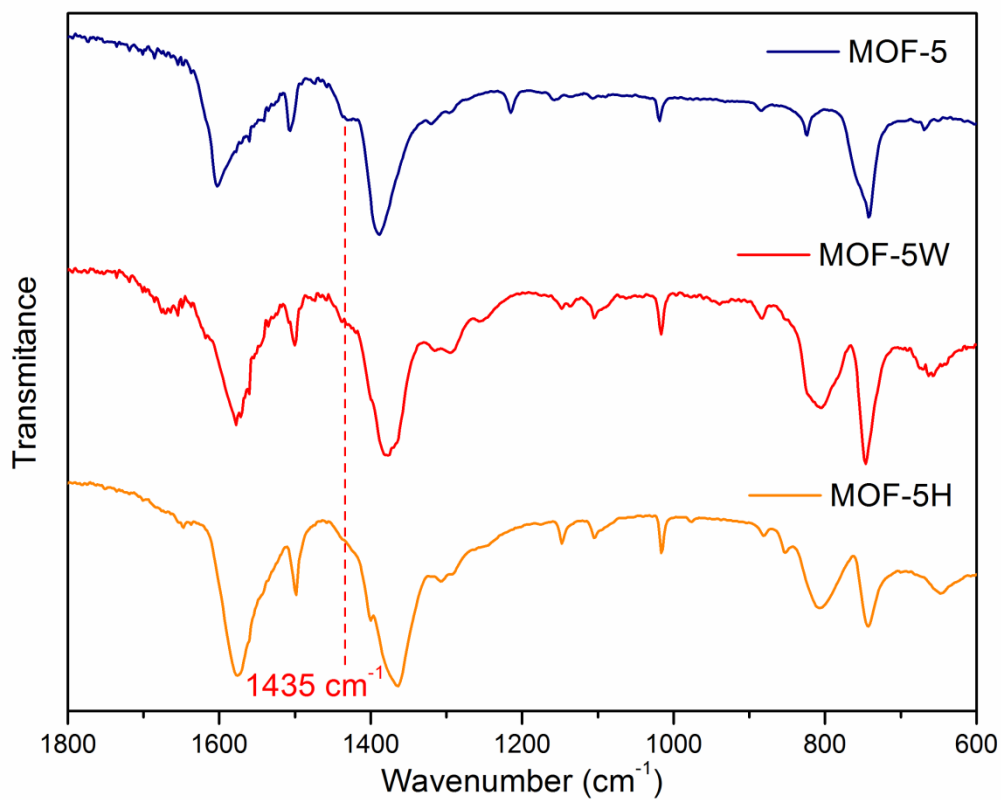

**Figure S6**

Absorption spectrum (1-R-T) of ZTDH. The inset shows the assessment of its optical bandgap. As discussed for MOF-5W, ZTDH is treated as an indirect semiconductor, due to the slow increment in the absorption.

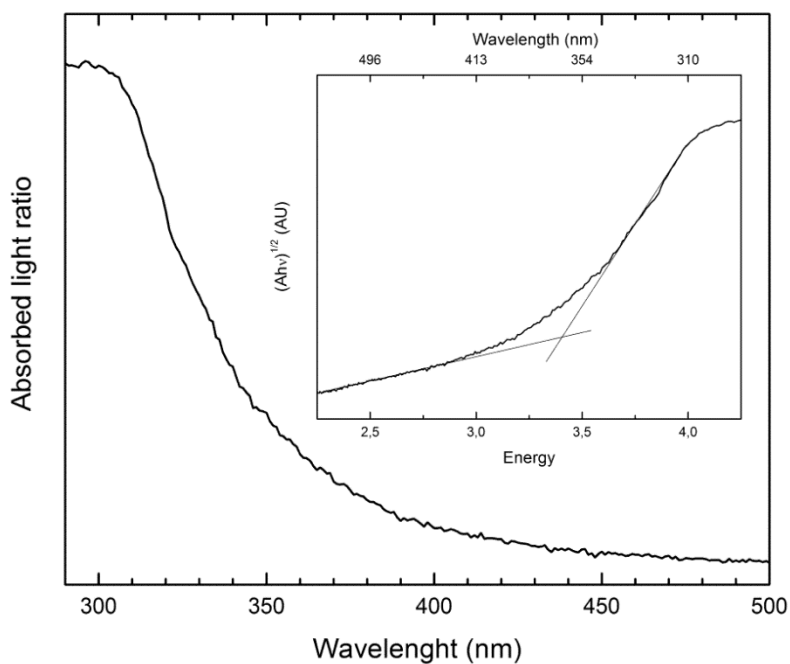

## **Figure S7**

Absorption spectra of 60 mM (straight line) and 0.6 mM (dotted line)  $\text{H}_2\text{BDC}$  (orange) and  $\text{Na}_2\text{BDC}$  (blue) solutions (in DMF and  $\text{H}_2\text{O}$ , respectively).

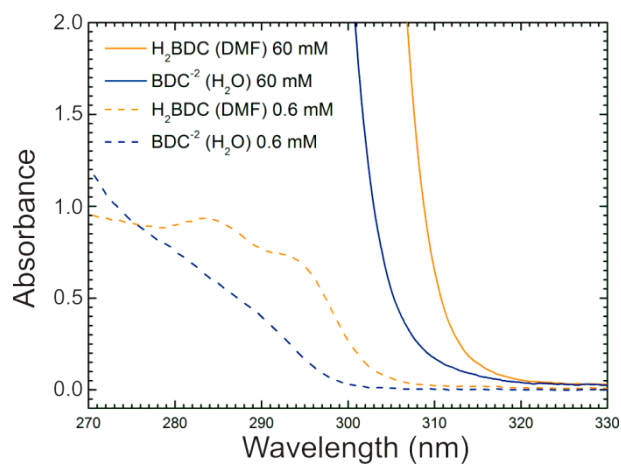

Supplement: c5ra11182j1.pdf [file c5ra11182j1.pdf]
